# Supplementary material for: Menin mediates epigenetic regulation via histone H3 lysine 9 methylation
Source: PubMed Central journal article supplement — Cell Death Dis. 2013 Apr 11;4(4):e583–. doi: 10.1038/cddis.2013.98 (PMC3668625; doi:10.1038/cddis.2013.98), 2013-04-11
Supplement: cddis201398x1.pdf [file cddis201398x1.pdf]

## Figure S1

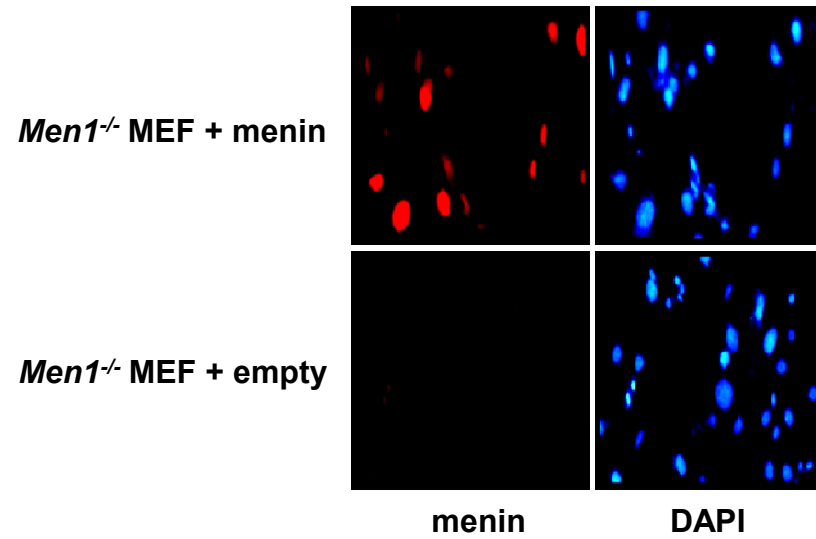

Figure S1. *Men1*<sup>-/-</sup> cells were infected with control retroviruses or retroviruses expressing menin. The expression of menin in the infected cells was confirmed by immunohistochemistry using menin antibody.

## Figure S2

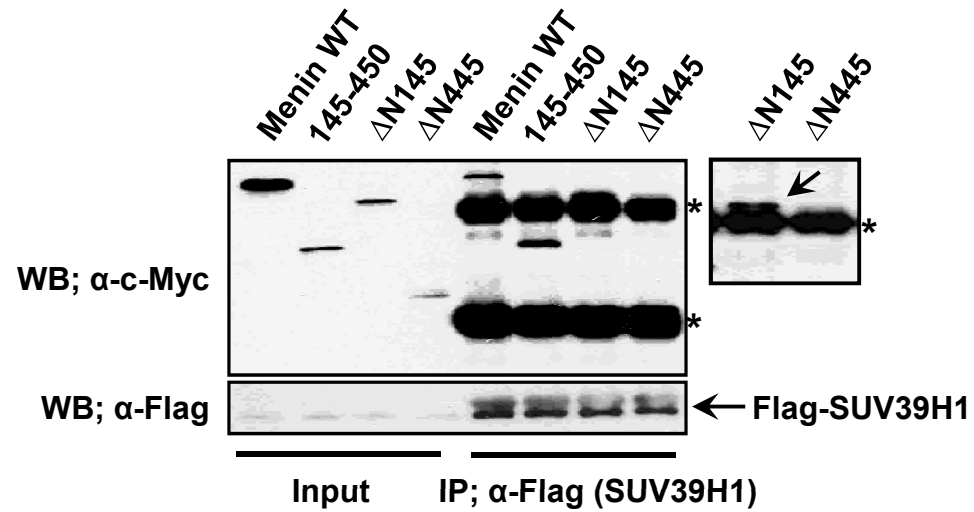

Figure S2. 293T cells were transfected with vectors expressing truncated menin mutants and Flag-SUV39H1 indicated. Whole-cell extracts were immunoprecipitated with anti-Flag antibody. Immunoprecipitates were analyzed by Western blot assay with antibodies against Myc and Flag epitopes. The asterisks (\*) denote nonspecific cross-reactive bands. To increase the resolution of  $\Delta$ N145 from the background, data obtained by different gel running is shown.

## Figure S3

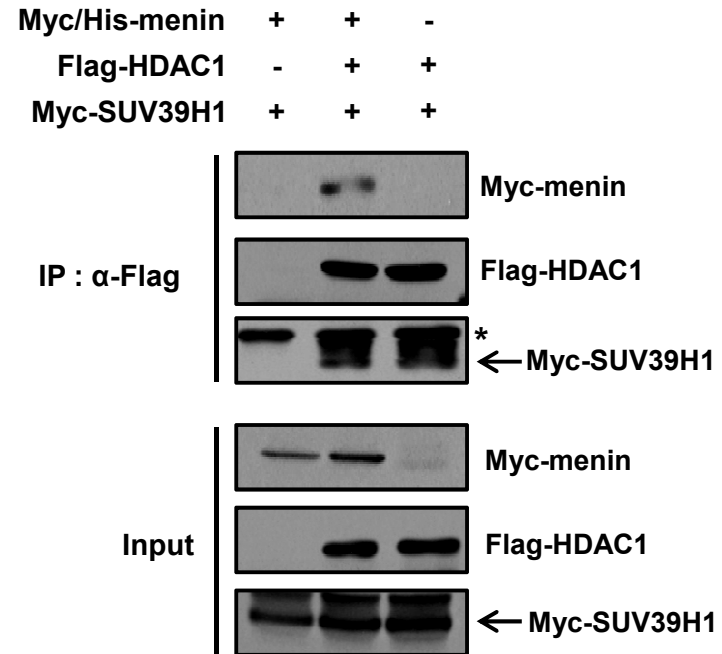

Figure S3. Menin associates with HDAC1 and SUV39H1. 293T cells were transfected with Myc/His-menin plus Flag-HDAC1 and Myc-SUV39H1 expression vectors as indicated. Whole-cell extracts were immunoprecipitated with anti-Flag antibody, and the immunoprecipitates were analyzed by western blotting using anti-Flag or anti-Myc antibodies. The asterisks(\*) denote IgG heavy chain bands.

## Figure S4

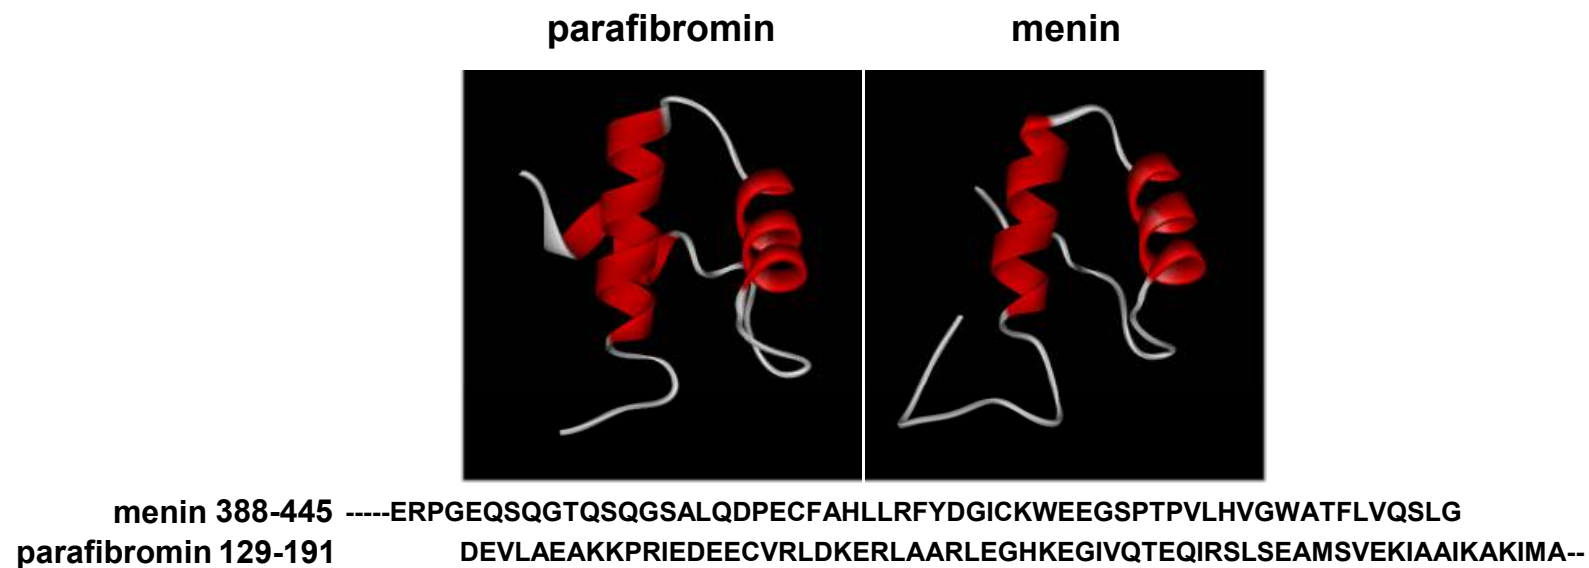

Figure S4. The SUV39H1 binding domains of parafibromin and menin have a remote homology. Their structures were predicted with fold recognition by threading method using the structure of paired box protein Pax5 (PDB entry: 1K78) as a template.

Figure S5

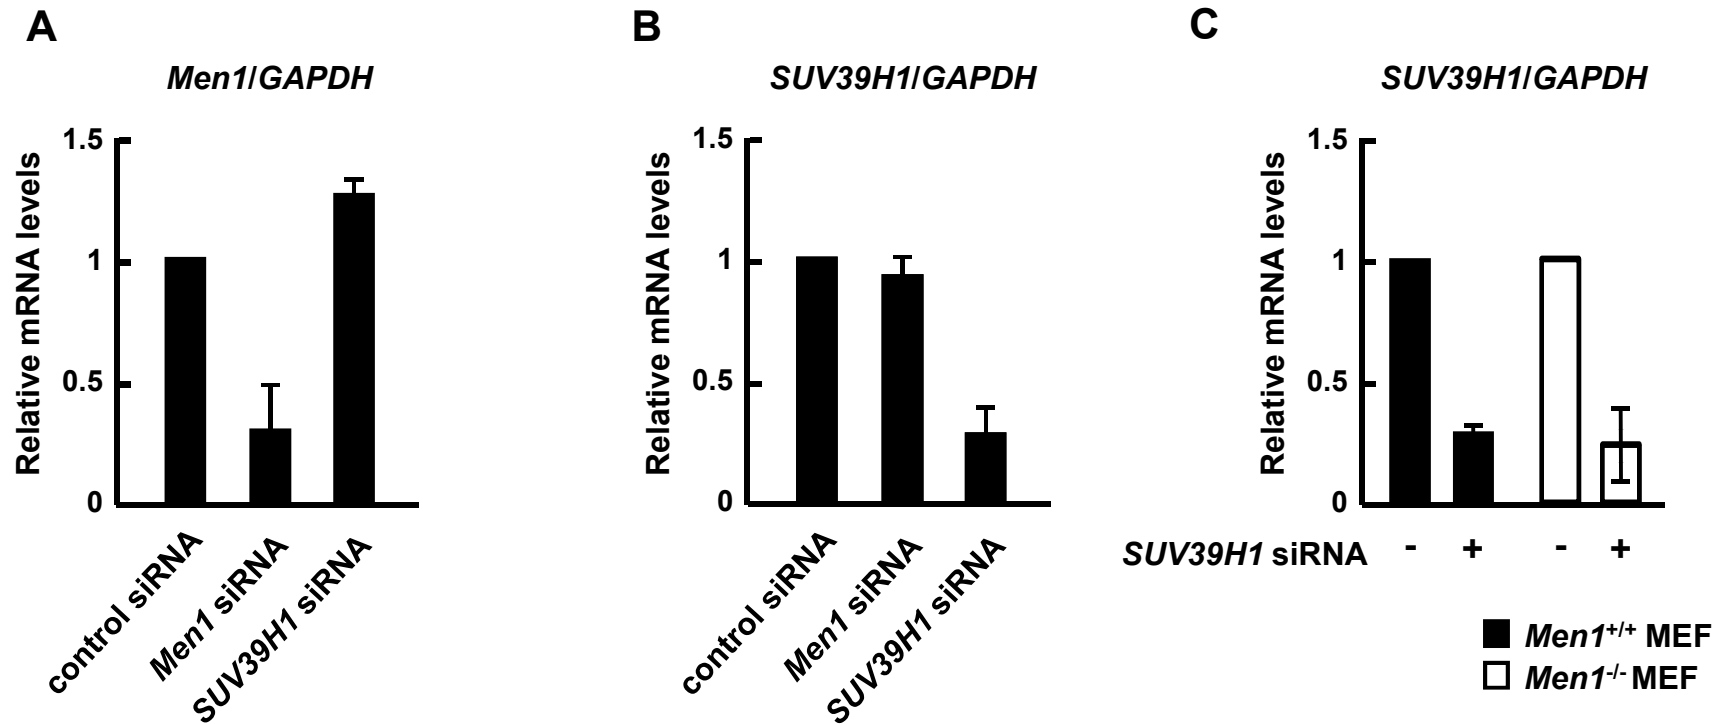

Figure S5. (A-C) The specificity of siRNAs targeting *Men1* or *SUV39H1* was confirmed by quantitative real-time PCR. *Men1*<sup>+/+</sup> or *Men1*<sup>-/-</sup> cells were treated with siRNAs as indicated for 24 hr and total RNA was isolated to detect the expression level of *Men1* or *SUV39H1*. *SUV39H1* siRNA did not interfere with the level of menin and vice versa. Each mRNA level was normalized to the *GAPDH* expression level and presented as a relative value. Error bars represent standard deviation (n = 3).

**Figure S6**

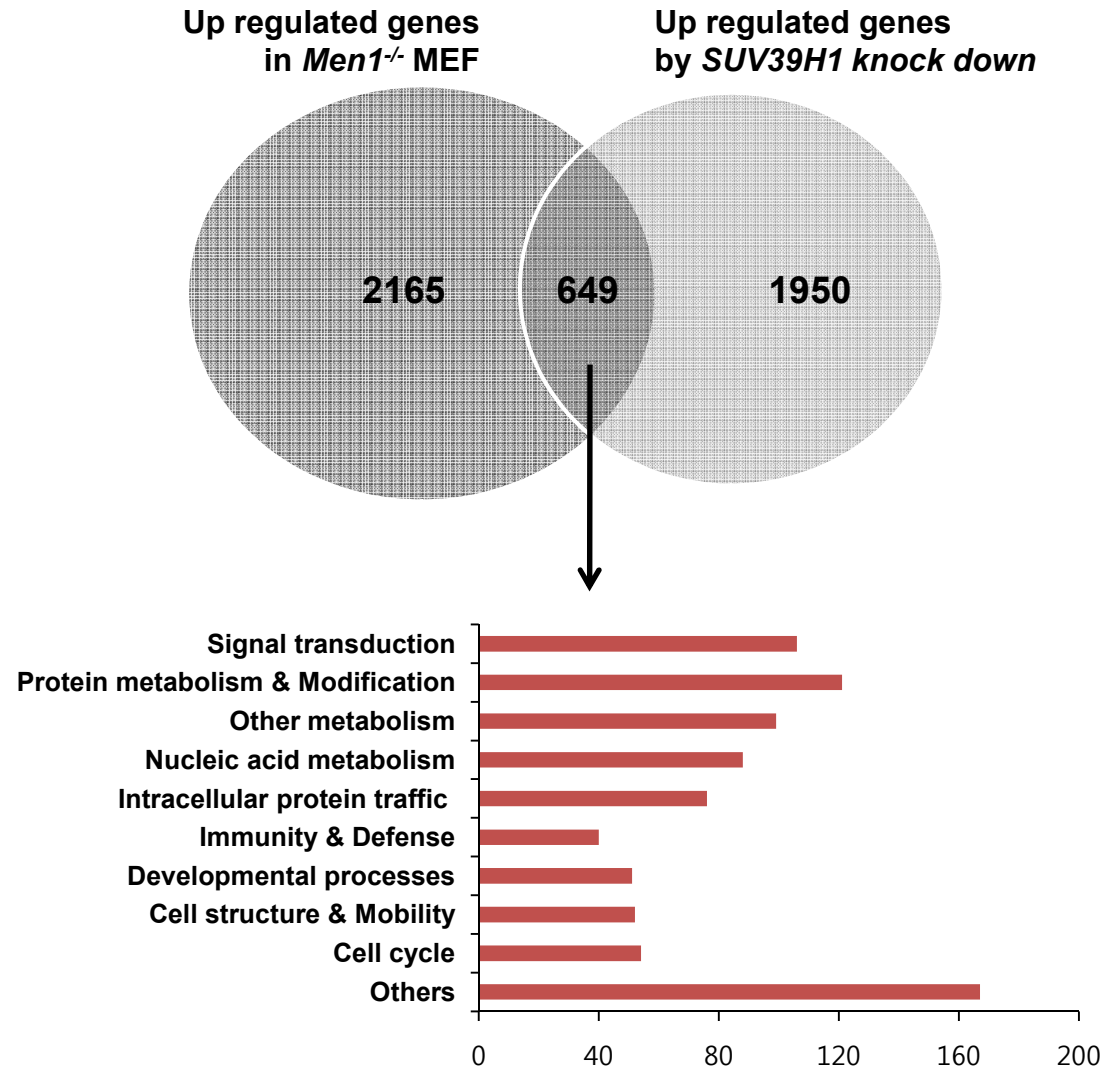

Figure S6. The cDNA microarray analysis to reveal common target genes of menin and SUV39H1. Venn diagram summarizing differentially expressed genes (up regulated genes) in *Men1*<sup>-/-</sup> MEFs vs. *Men1*<sup>+/+</sup> MEFs and in SUV39H1 knockdown vs. control cells (top panel). Genes with fold change >1.2 were shown. Bar chart shows the gene ontology classification of the common target genes. Some genes are classified in more than two different categories.

## Figure S7

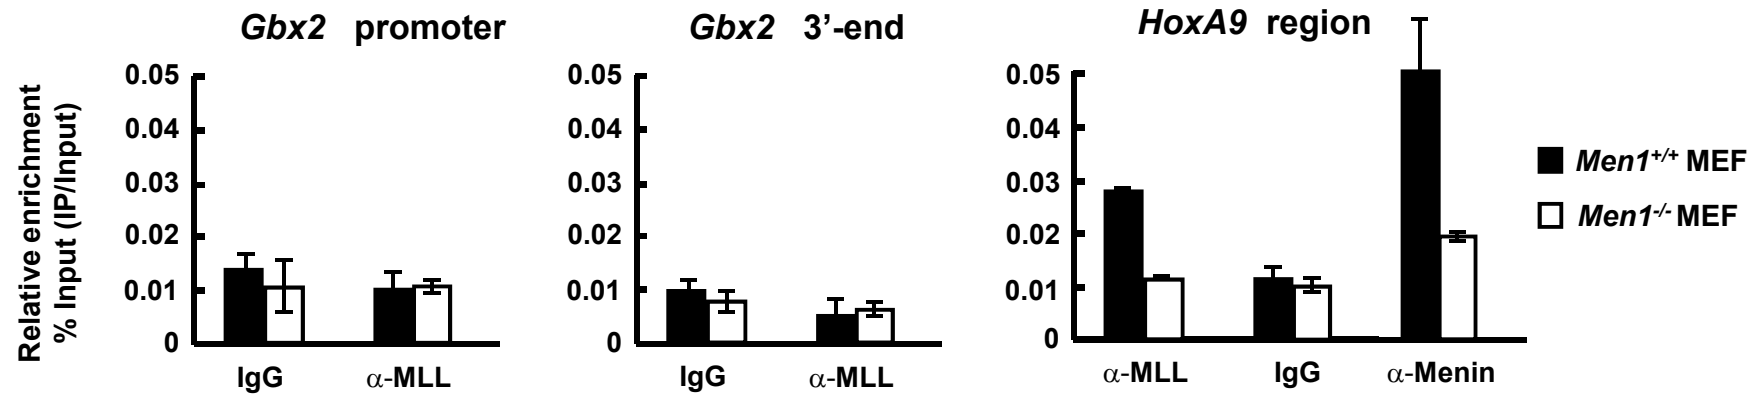

Figure S7. Occupancy of MLL around the *Gbx2* and *HoxA9* regions. Recruitment of MLL protein around the *GBX2* or *Hoxa9* was analyzed by ChIP assay. Chromatin solution was prepared from *Men1*<sup>+/+</sup> and *Men1*<sup>-/-</sup> cells and subjected to ChIP using control rabbit IgG and the antibodies against MLL ( $\alpha$ -MLL Ab) or menin ( $\alpha$ -menin Ab). Immuno-precipitated DNA was analyzed in duplicates by quantitative real time PCR and the relative enrichment of proteins was shown. The data represent the percentage of ChIP (IP/Input) and the error bars indicate the SD.
